# Supplementary material for: Hormonal responses to non-nutritive sweeteners in water and diet soda
Source: PubMed Central journal article supplement (PMC5073441; doi:10.1186/s12986-016-0129-3), 2016-10-21
Supplement: 12986_2016_129_MOESM2_ESM.pdf [file 12986_2016_129_MOESM2_ESM.pdf]

|                                                             | Diet Rite Cola™      | Seltzer Water        | p-value |
|-------------------------------------------------------------|----------------------|----------------------|---------|
| Acetaminophen AUC ( $\mu\text{mol/L}/120 \text{ min}$ )     | 6031.3 $\pm$ 275.7   | 5681.4 $\pm$ 224.0   | 0.13    |
| 3-O-methyl glucose AUC ( $\mu\text{g/mL}/120 \text{ min}$ ) | 10278.5 $\pm$ 435.09 | 10046.1 $\pm$ 357.18 | 0.52    |

A

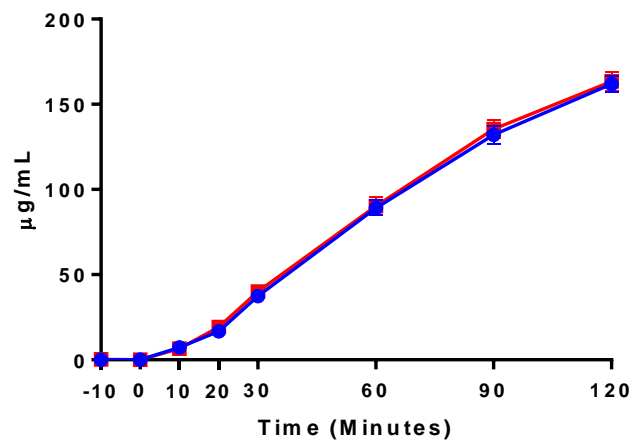

B

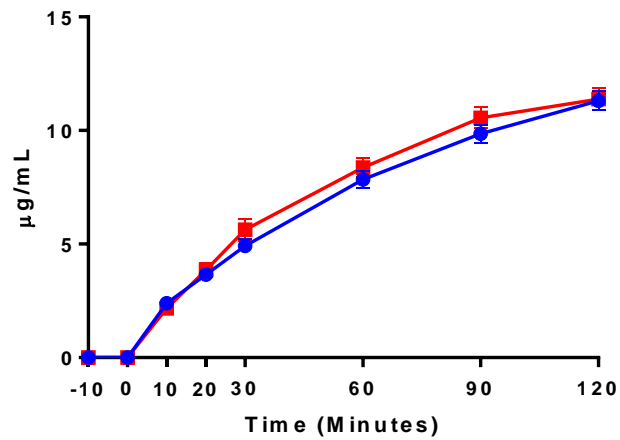

**Supplemental Figure S1.** Serial data from OGTTs. Acetaminophen (A) and 3-*O*-methyl glucose (3-OMG) (B) are shown after ingestion of either Diet Rite Cola™ (■), or seltzer water (●) 10 minutes prior to a 75 gram oral glucose load.
